# Supplementary material for: Site Specialization of Human Oral Veillonella Species
Source: PubMed Central journal article supplement (PMC9927086; doi:10.1128/spectrum.04042-22), 2023-01-25
Supplement: spectrum.04042-22-s0002.pdf [file spectrum.04042-22-s0002.pdf]

1 SUPPLEMENTAL FIGURES

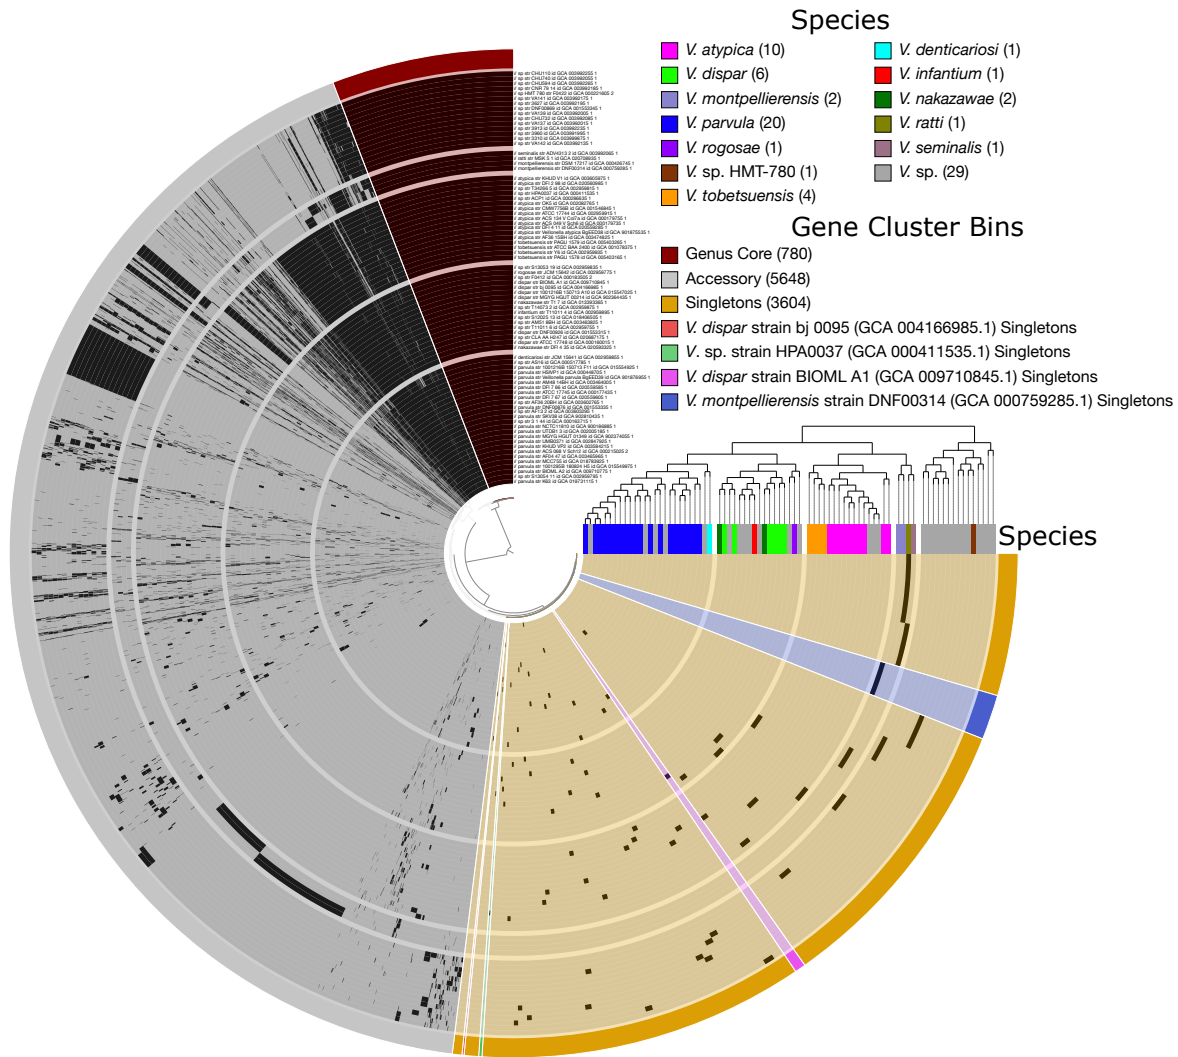

2  
 3 **Figure S1.** A pangenome of human oral *Veillonella* reference genomes (n = 79) was constructed  
 4 using a set genomes dereplicated based on a 99% ANI threshold to test the effect of a 98% ANI  
 5 threshold on a comparative pangenome analysis. Genomes are hierarchically clustered based on  
 6 gene cluster frequency (i.e., the number of representatives of each gene cluster present in each  
 7 genome). Gene clusters are arranged based on their presence or absence across the genomes and  
 8 colored according to their presence in all genomes (core; red; n = 780), a subset of genomes  
 9 (accessory; gray; n = 5648), or unique to a single genome (singletons; gold; n = 3604). Singleton

10 gene clusters unique to a genome that was added because of increasing the ANI threshold are  
11 colored uniquely.

12

13

14

15

16

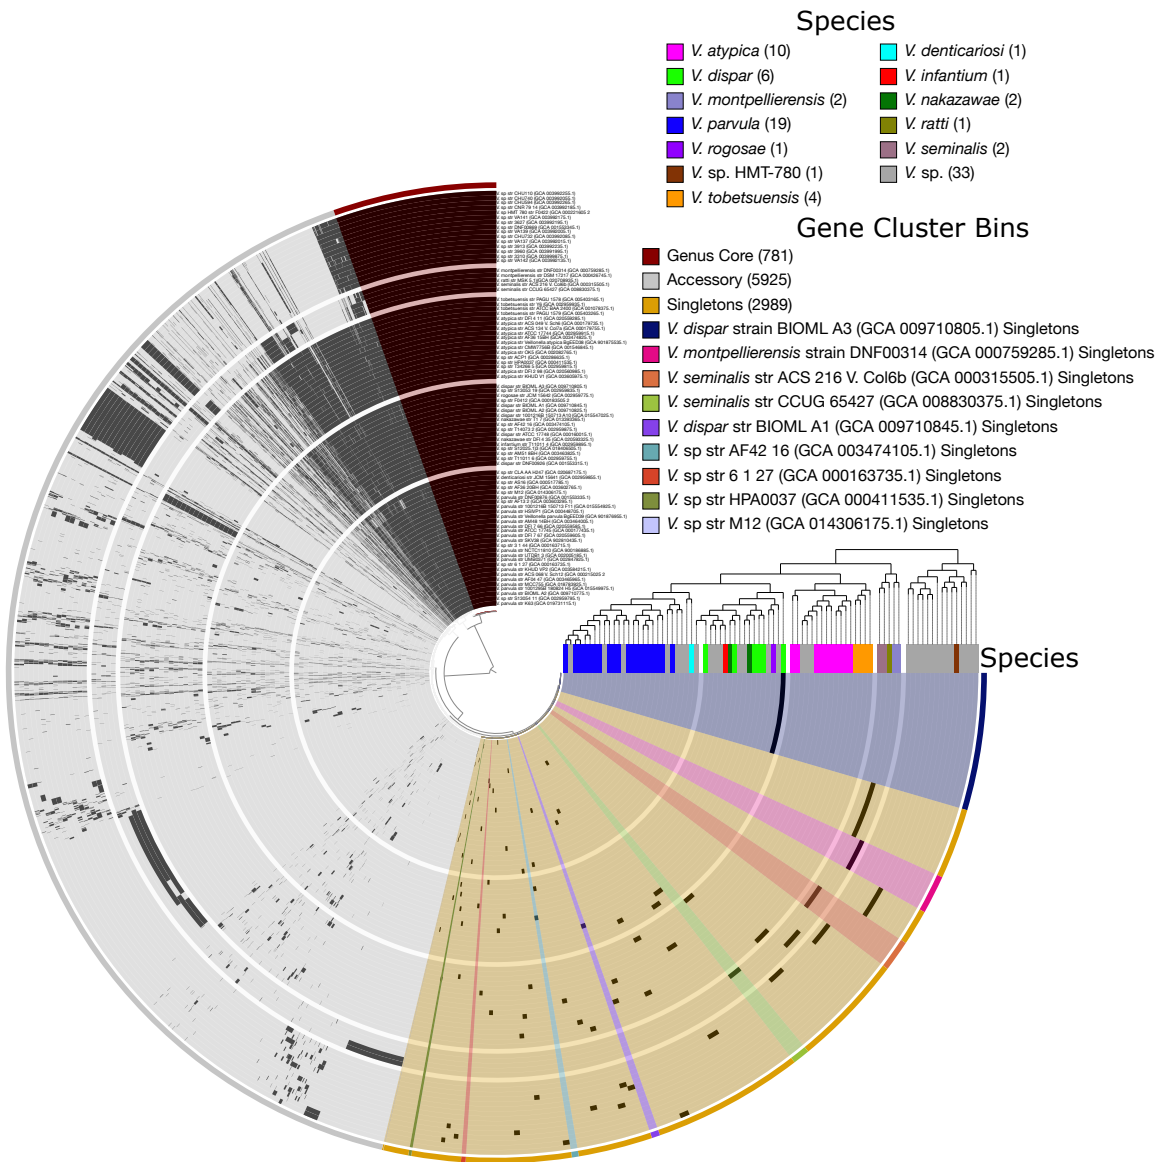

17

18 **Figure S2.** A pangenome of human oral *Veillonella* reference genomes (n = 82) was constructed  
 19 using a set genomes dereplicated based on a 99.5% ANI threshold to test the effect of a 98%  
 20 ANI threshold on a comparative pangenome analysis. Genomes and gene clusters are arranged as  
 21 in Figure S1.

22

23

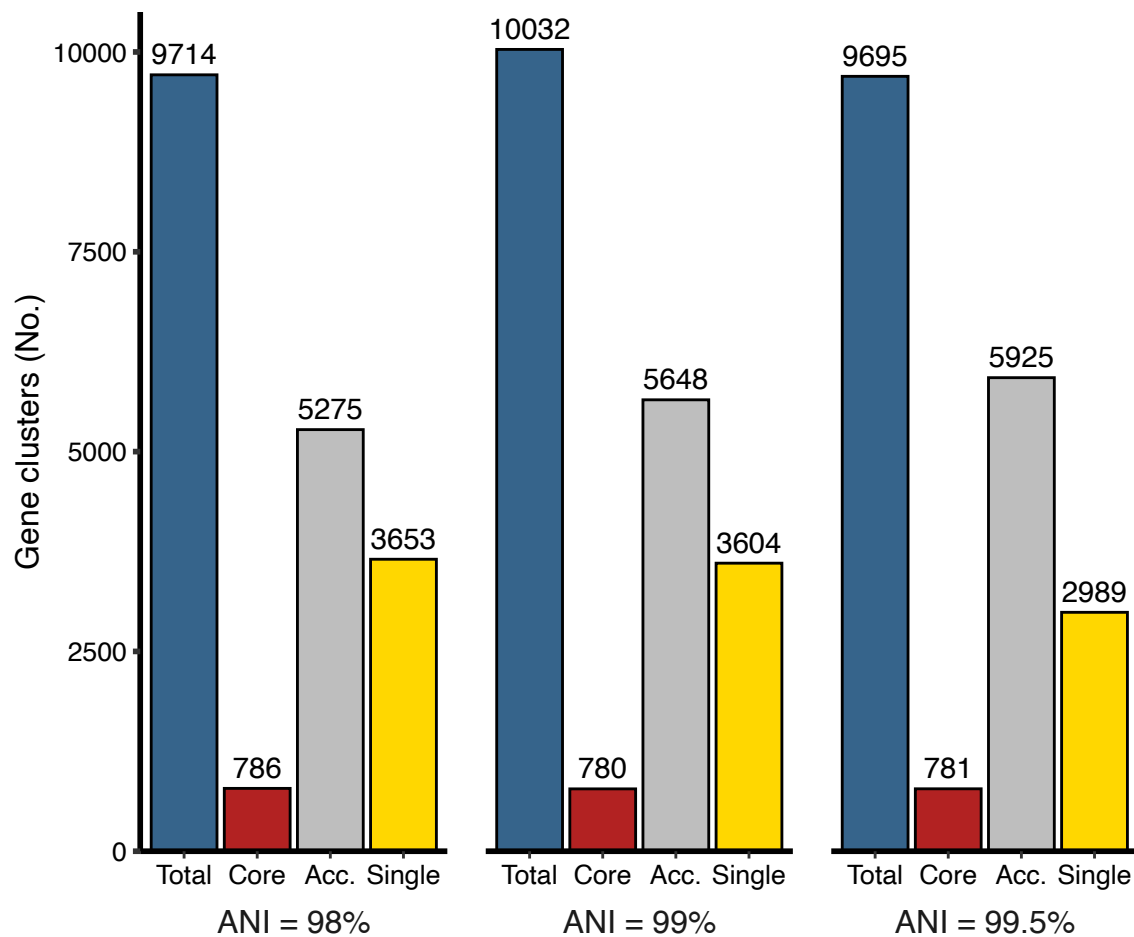

24

25 **Figure S3.** Comparison of the number of gene cluster bins for three pangenomes of human  
 26 *Veillonella* species that were constructed using a set of genomes dereplicated based on a 98%,  
 27 99% or a 99.5% ANI threshold. The distinct gene clusters of each pangenome include core genes  
 28 that occur in every genome (red), singleton genes that occur in only a single genome (gold) and  
 29 accessory genes that occur in more than one, but not all genomes (gray).

30

31

32

33

34 **SUPPLEMENTAL TABLE LEGENDS**

35

36 **Table S1.** Metadata for *Veillonella* reference genomes.

37

38 **Table S2.** Whole-genome average nucleotide percent identity for *Veillonella* reference genomes.

39

40 **Table S3.** Metabolic pathway enrichment test results.

41

42 **Table S4.** Results for enrichment of COG20, Pfams and KEGG associations.

43

44 **Table S5.** ANI dereplication test blast results. We analyzed how additional genomes altered  
45 accessory gene content by inspecting the singleton gene clusters unique to each of the additional  
46 genomes. For each pangenome, we manually binned singleton gene clusters for each of the  
47 additional genomes, extracted their amino acid sequences using `anvi-get-sequences-for-gene-`  
48 `clusters` and blasted each sequence against the NCBI non-redundant protein database (1), which  
49 includes protein sequences from GenPept, Swissprot, PIR, PDF, PDB, and NCBI RefSeq.

50

51 **REFERENCES**

- 52 1. O’Leary NA, Wright MW, Brister JR, Ciufu S, Haddad D, McVeigh R, Rajput B, Robbertse  
53 B, Smith-White B, Ako-Adjei D. 2016. Reference sequence (RefSeq) database at NCBI:  
54 current status, taxonomic expansion, and functional annotation. *Nucleic Acids Res* 44:D733–  
55 D745.

56
